# Supplementary material
Source: MDPI journal article supplement (https://www.mdpi.com/2313-433X/9/9/178)
Supplement: s1 [file s1]

Title: 2-<sup>[18F]</sup>FDG-PET/CT in cancer of unknown primary tumour – a retrospective register-based cohort study

Journal: Journal of Imaging

Authors: Heidi Rimer\*, Melina S. Jensen\*, Sara E. Dahlsgaard-Wallenius, Lise Eckhoff, Peter Thye-Rønn, Charlotte Kristiansen, Malene G. Hildebrandt, Oke Gerke

\*Shared co-first authorship

Corresponding author: Oke Gerke; University of Southern Denmark, Department of Clinical Research, Odense, Denmark and Odense University Hospital, Department of Nuclear Medicine, Odense, Denmark

Corresponding author E-mail: Oke.Gerke@rsyd.dk

### Online Resource 3: Survival (subgroup analysis on the impact of a definitive diagnosis)

| Variable               | Crude univariable model |               |         | Multivariable model 1:<br>adjusted for propensity<br>score |               |         | Multivariable model 2:<br>adjusted for age, sex,<br>treatment and propensity<br>score |               |         |
|------------------------|-------------------------|---------------|---------|------------------------------------------------------------|---------------|---------|---------------------------------------------------------------------------------------|---------------|---------|
|                        | HR                      | 95% CI        | P-value | HR                                                         | 95% CI        | P-value | HR                                                                                    | 95% CI        | P-value |
| PET/CT                 | 0.65                    | 0.38-<br>1.12 | 0.12    | 0.92                                                       | 0.51-<br>1.64 | 0.77    | 0.74                                                                                  | 0.41-<br>1.36 | 0.33    |
| Age                    |                         |               |         |                                                            |               |         | 1.01                                                                                  | 1.00-<br>1.03 | 0.13    |
| Sex (Male)             |                         |               |         |                                                            |               |         | 1.06                                                                                  | 0.71-<br>1.60 | 0.78    |
| Treatment<br>(yes)     |                         |               |         |                                                            |               |         | 0.34                                                                                  | 0.21-<br>0.54 | <0.001  |
| Treatment<br>(unknown) |                         |               |         |                                                            |               |         | 0.40                                                                                  | 0.05-<br>3.06 | 0.38    |
| Propensity<br>score    |                         |               |         | 0.11                                                       | 0.03-<br>0.46 | 0.003   | 0.32                                                                                  | 0.06-<br>1.69 | 0.18    |

**Supplemental Table 4** Cox-regression regarding survival in a subgroup of CUP patients who received a definitive diagnosis,

presenting the hazard ratio of patients who received a 2-<sup>[18F]</sup>FDG-PET/CT with patients who received a CT as baseline. CUP: Cancer of unknown primary tumour. CT: Computed tomography. 2-<sup>[18F]</sup>FDG: 2-deoxy-2-<sup>[18F]</sup>fluoro-D-glucose. PET: Positron emission tomography.

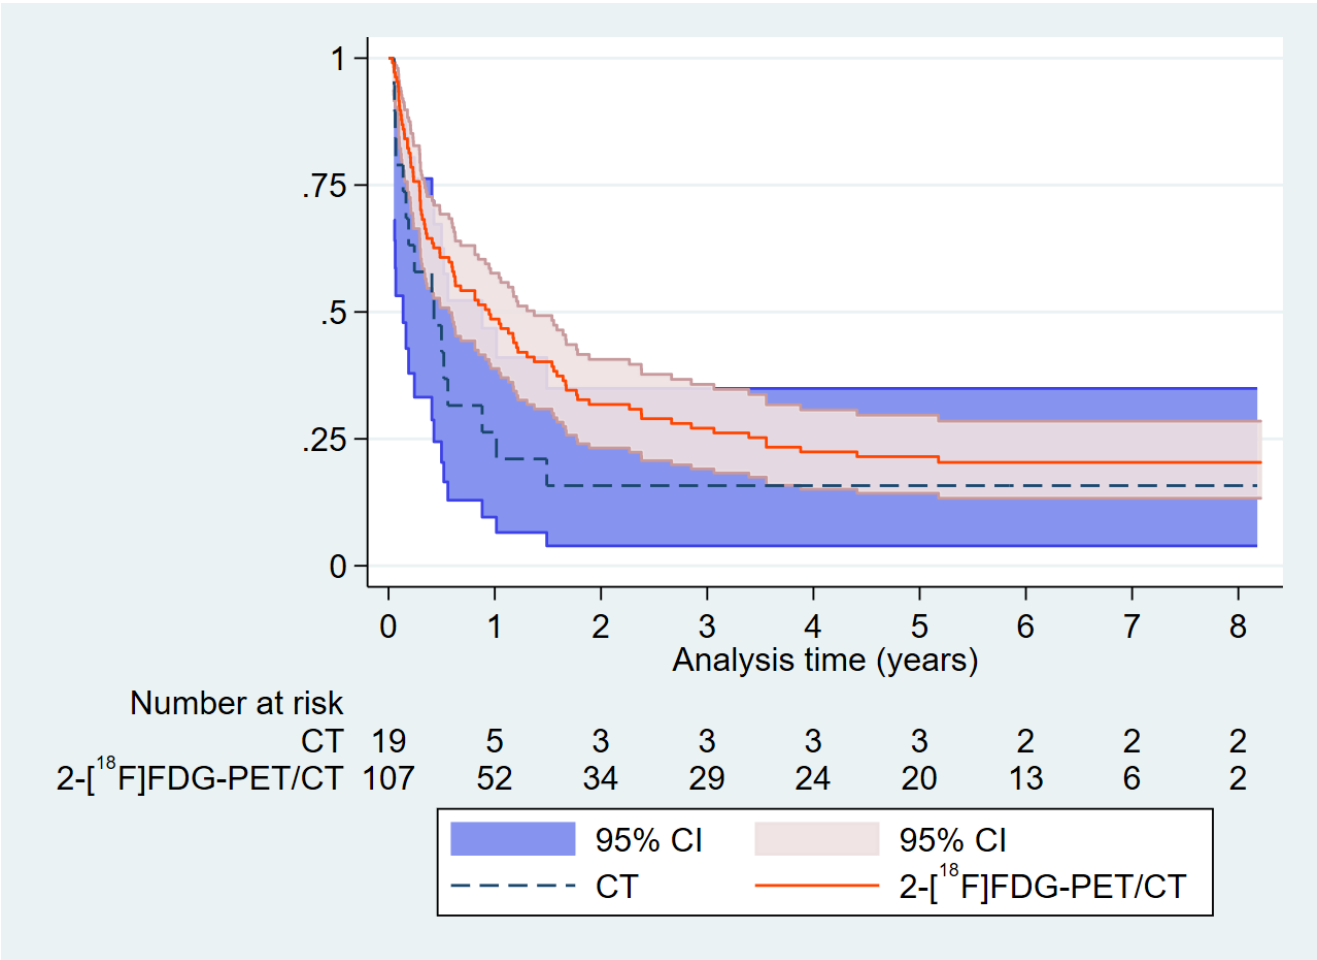

**Supplemental Fig. 2** Kaplan-Meier survival estimates in a subgroup of CUP patients who received a final diagnosis, comparing patients who received a 2-<sup>18</sup>F]FDG-PET/CT with patients who received a CT. CUP: Cancer of unknown primary tumour. CT: Computed tomography. 2-<sup>18</sup>F]FDG: 2-deoxy-2-<sup>18</sup>F]fluoro-D-glucose. PET: Positron emission tomography.

The number of patients at risk decreased from 19 to 5 in the CT group and from 107 to 52 in the 2-<sup>18</sup>F]FDG-PET/CT group within one year. Within two years, this number further decreased to 3 in the CT group and 34 in the 2-<sup>18</sup>F]FDG-PET/CT group, while the numbers after five years were 3 in the CT group and 20 in the 2-<sup>18</sup>F]FDG-PET/CT group, respectively. Although survival in the 2-<sup>18</sup>F]FDG-PET/CT group was consistently higher than in the CT group, none of this proved statistically significant due to overlapping 95% confidence intervals

| Variable            | Crude univariable model |           |         | Multivariable model 1:<br>adjusted for propensity score |           |         | Multivariable model 2:<br>adjusted for age, sex, treatment and propensity score |           |         |
|---------------------|-------------------------|-----------|---------|---------------------------------------------------------|-----------|---------|---------------------------------------------------------------------------------|-----------|---------|
|                     | HR                      | 95% CI    | P-value | HR                                                      | 95% CI    | P-value | HR                                                                              | 95% CI    | P-value |
| PET/CT              | 0.67                    | 0.37-1.22 | 0.19    | 0.80                                                    | 0.43-1.46 | 0.46    | 0.61                                                                            | 0.32-1.20 | 0.13    |
| Age                 |                         |           |         |                                                         |           |         | 1.02                                                                            | 0.99-1.05 | 0.18    |
| Sex (Male)          |                         |           |         |                                                         |           |         | 1.68                                                                            | 0.89-3.18 | 0.11    |
| Treatment (yes)     |                         |           |         |                                                         |           |         | 0.39                                                                            | 0.20-0.74 | 0.004   |
| Treatment (unknown) |                         |           |         |                                                         |           |         | <0.001                                                                          | N/A       | 1.00    |
| Propensity score    |                         |           |         | 0.06                                                    | 0.01-0.57 | 0.015   | 0.16                                                                            | 0.01-1.79 | 0.14    |

**Supplemental Table 5** Cox-regression regarding survival in a subgroup of CUP patients who did not receive a definitive diagnosis, presenting the hazard ratio of patients who received a 2-[<sup>18</sup>F]FDG-PET/CT with patients who received a CT as baseline. CUP: Cancer of unknown primary tumour. CT: Computed tomography. 2-[<sup>18</sup>F]FDG: 2-deoxy-2-[<sup>18</sup>F]fluoro-D-glucose. PET: Positron emission tomography.

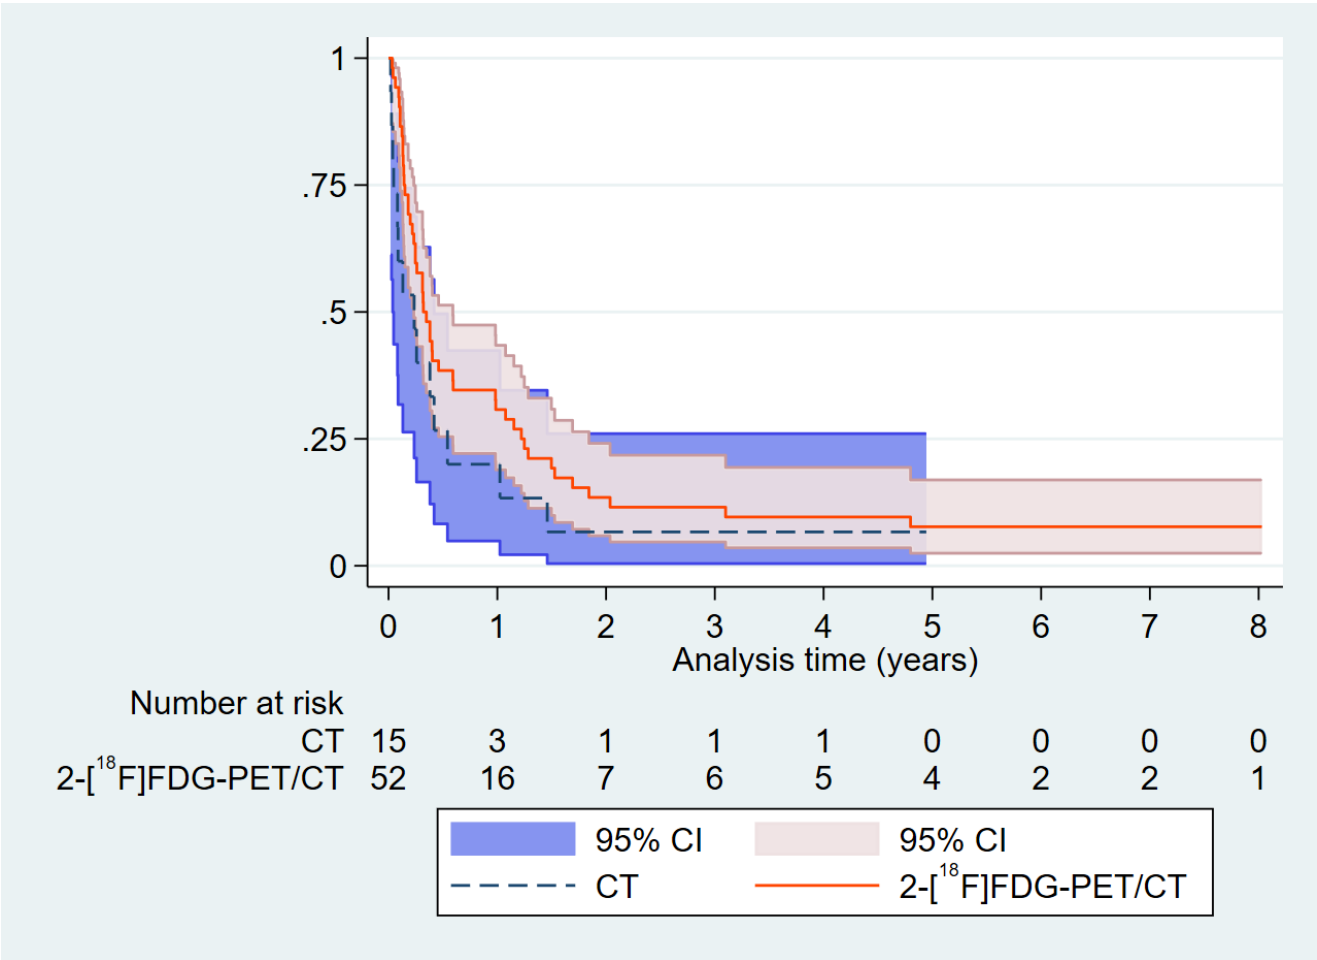

**Supplemental Fig. 3** Kaplan-Meier survival estimates in a subgroup of CUP patients who did not receive a final diagnosis, comparing patients who received a 2-<sup>18</sup>F]FDG-PET/CT with patients who received a CT. CUP: Cancer of unknown primary tumour. CT: Computed tomography. 2-<sup>18</sup>F]FDG: 2-deoxy-2-<sup>18</sup>F]fluoro-D-glucose. PET: Positron emission tomography.

The number of patients at risk decreased from 15 to 3 in the CT group and from 52 to 16 in the 2-<sup>18</sup>F]FDG-PET/CT group within one year. Within two years, this number further decreased to 1 in the CT group and 7 in the 2-<sup>18</sup>F]FDG-PET/CT group, while the numbers after five years were 0 in the CT group and 4 in the 2-<sup>18</sup>F]FDG-PET/CT group, respectively. Although survival in the 2-<sup>18</sup>F]FDG-PET/CT group was consistently higher than in the CT group, none of this proved statistically significant due to overlapping 95% confidence intervals
