# Supplementary material
Source: MDPI journal article supplement (https://www.mdpi.com/2313-433X/9/9/178)
Supplement: s1 [file s1]

Title: 2-<sup>[18F]</sup>FDG-PET/CT in cancer of unknown primary tumour – a retrospective register-based cohort study

Journal: Journal of Imaging

Authors: Heidi Rimer\*, Melina S. Jensen\*, Sara E. Dahlsgaard-Wallenius, Lise Eckhoff, Peter Thye-Rønn, Charlotte Kristiansen, Malene G. Hildebrandt, Oke Gerke

\*Shared co-first authorship

Corresponding author: Oke Gerke; University of Southern Denmark, Department of Clinical Research, Odense, Denmark and Odense University Hospital, Department of Nuclear Medicine, Odense, Denmark

Corresponding author E-mail: Oke.Gerke@rsyd.dk

## Online Resource 1: Types of tissue found in metastasis biopsy

|                                  | 2- <sup>[18F]</sup> FDG-PET/CT<br>(N=159) | CT (N=34)  | P-value |
|----------------------------------|-------------------------------------------|------------|---------|
| Adenocarcinoma                   | 61 (38.4%)                                | 18 (52.9%) | 0.12    |
| Undifferentiated carcinoma       | 38 (23.9%)                                | 5 (14.7%)  | 0.24    |
| Undifferentiated malignant cells | 27 (17.0%)                                | 7 (20.6%)  | 0.62    |
| Neuroendocrine carcinoma         | 11 (6.9%)                                 | 3 (8.8%)   | 0.70    |
| Squamous cell carcinoma          | 11 (6.9%)                                 | 1 (2.9%)   | 0.38    |
| Other                            | 11 (6.9%)                                 | 0          | 0.11    |
| Sarcoma                          | 2 (1.3%)                                  | 0          | 0.51    |
| Malignant melanoma               | 1 (0.6%)                                  | 0          | 0.64    |

**Supplemental Table 1** Types of tissue found in a metastasis biopsy, comparing CUP patients who received a 2-<sup>[18F]</sup>FDG-PET/CT with patients who received a CT using a Chi-squared test. CUP: Cancer of unknown primary tumour. CT: Computed tomography. 2-<sup>[18F]</sup>FDG: 2-deoxy-2-<sup>[18F]</sup>fluoro-D-glucose. PET: Positron emission tomography.
