# Supplementary material
Source: MDPI journal article supplement (https://www.mdpi.com/2313-433X/9/9/178)
Supplement: s1 [file s1]

Title: 2-<sup>[18F]</sup>FDG-PET/CT in cancer of unknown primary tumour – a retrospective register-based cohort study

Journal: Journal of Imaging

Authors: Heidi Rimer\*, Melina S. Jensen\*, Sara E. Dahlsgaard-Wallenius, Lise Eckhoff, Peter Thye-Rønn, Charlotte Kristiansen, Malene G. Hildebrandt, Oke Gerke

\*Shared co-first authorship

Corresponding author: Oke Gerke; University of Southern Denmark, Department of Clinical Research, Odense, Denmark and Odense University Hospital, Department of Nuclear Medicine, Odense, Denmark

Corresponding author E-mail: Oke.Gerke@rsyd.dk

## Online Resource 2: Propensity score analysis

| N=193                             | Coefficient (95% CI)    | P-value |
|-----------------------------------|-------------------------|---------|
| Sex                               |                         |         |
| - Male                            | -0.34 (-0.80-0.12)      | 0.15    |
| Age at first hospital visit       | 0.0024 (-0.018-0.023)   | 0.82    |
| Location of first hospital visit  | -0.0038 (-0.012-0.0039) | 0.33    |
| Previously known cancer diagnoses |                         |         |
| - 1                               | 0.59 (-0.041-1.23)      | 0.067   |
| - 2 or >2                         | -1.05 (-2.16-0.052)     | 0.062   |
| Performance status                |                         |         |
| - 1                               | -0.47 (-1.33-0.38)      | 0.28    |
| - 2                               | -0.37 (-1.41-0.67)      | 0.49    |
| - 3                               | -1.32 (-2.21-(-0.42))   | 0.004   |
| - 4                               | -1.12 (-2.35-0.098)     | 0.071   |
| - Not obtained                    | -0.66 (-1.39-0.070)     | 0.076   |
| Comorbidities                     | -0.069 (-0.21-0.067)    | 0.32    |

**Supplemental Table 2** Factors contributing to the likelihood of CUP patients receiving a 2-<sup>[18F]</sup>FDG-PET/CT. CUP: Cancer of unknown primary tumour. CT: Computed tomography. 2-<sup>[18F]</sup>FDG: 2-deoxy-2-<sup>[18F]</sup>fluoro-D-glucose. PET: Positron emission tomography.

|                                | 2- <sup>[18F]</sup> FDG-PET/CT<br>(N=159) | CT (N=34)        | P-value |
|--------------------------------|-------------------------------------------|------------------|---------|
| Mean propensity score (95% CI) | 0.84 (0.82-0.86)                          | 0.74 (0.69-0.79) | <0.001  |

**Supplemental Table 3** Comparison of propensity scores of CUP patients who received a 2-<sup>[18F]</sup>FDG-PET/CT and patients who received a CT, respectively, using an unpaired t-test. CUP: Cancer of unknown primary tumour. CT: Computed tomography. 2-<sup>[18F]</sup>FDG: 2-deoxy-2-<sup>[18F]</sup>fluoro-D-glucose. PET: Positron emission tomography.

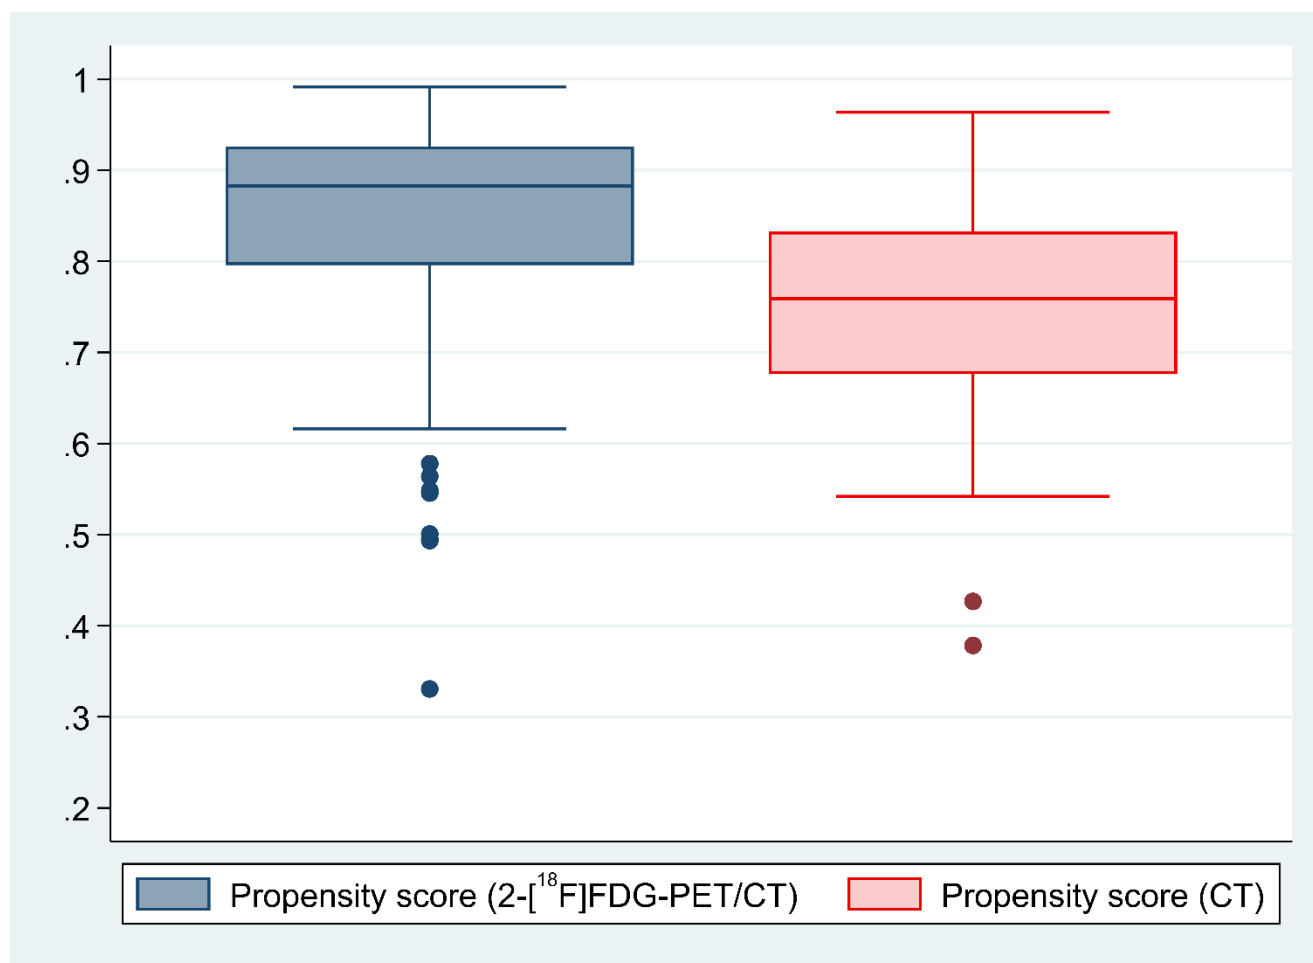

**Supplemental Fig. 1** Boxplot representing propensity scores based on background characteristics, comparing CUP patients who received a 2-<sup>18</sup>F]FDG-PET/CT with patients who received a CT. CUP: Cancer of unknown primary tumour. CT: Computed tomography. 2-<sup>18</sup>F]FDG: 2-deoxy-2-<sup>18</sup>F]fluoro-D-glucose. PET: Positron emission tomography.

For 2-<sup>18</sup>F]FDG-PET/CT, median propensity score was 88%, while the interquartile range was 80% to 93% and minimum/maximum was 33% and 99%, respectively. For CT, median propensity score was 76%, while the interquartile range was 68% to 83% and minimum/maximum was 38% and 96%, respectively
