# Supplementary material
Source: MDPI journal article supplement (https://www.mdpi.com/2313-433X/9/9/178)
Supplement: s1 [file s1]

## Online Resource 4: Time to final diagnosis

| Group                                           | CT          | 2- <sup>18</sup> F]FDG-PET/CT | Total       |
|-------------------------------------------------|-------------|-------------------------------|-------------|
| Number of patients                              | 34          | 159                           | 193         |
| - Number of patients with definitive diagnosis  | 19 (55.9%)  | 107 (67.3%)                   | 126 (65.3%) |
| Total follow-up time (days)                     | 3030        | 9770                          | 12800       |
| - Patients with definitive diagnosis            | 803         | 6326                          | 7129        |
| Median (min-max) time to final diagnosis (days) | 21 (7-1806) | 35 (5-619)                    | 33 (5-1806) |
| - Patients with definitive diagnosis            | 21 (7-250)  | 33 (5-484)                    | 31 (5-484)  |

**Supplemental Table 6** Overview on time to final diagnosis amongst CUP patients who received a 2-<sup>18</sup>F]FDG-PET/CT scan or a CT

scan, respectively. CUP: Cancer of unknown primary tumour. CT: Computed tomography. 2-<sup>18</sup>F]FDG: 2-deoxy-2-<sup>18</sup>F]fluoro-D-glucose. PET: Positron emission tomography.

| Variable         | Crude univariable model |           |         | Multivariable model 1:<br>adjusted for propensity-score |           |         | Multivariable model 2:<br>adjusted for age, sex and propensity score |           |         |
|------------------|-------------------------|-----------|---------|---------------------------------------------------------|-----------|---------|----------------------------------------------------------------------|-----------|---------|
|                  | HR                      | 95% CI    | P-value | HR                                                      | 95% CI    | P-value | HR                                                                   | 95% CI    | P-value |
| PET/CT           | 0.72                    | 0.49-1.05 | 0.090   | 0.74                                                    | 0.50-1.12 | 0.15    | 0.72                                                                 | 0.48-1.09 | 0.12    |
| Age              |                         |           |         |                                                         |           |         | 1.00                                                                 | 0.99-1.01 | 0.89    |
| Sex (Male)       |                         |           |         |                                                         |           |         | 1.30                                                                 | 0.97-1.74 | 0.082   |
| Propensity score |                         |           |         | 0.75                                                    | 0.21-2.67 | 0.66    | 0.94                                                                 | 0.26-3.42 | 0.93    |

**Supplemental Table 7** Cox-regression regarding time to final diagnosis in CUP patients, presenting the hazard ratio of patients who

received a 2-<sup>18</sup>F]FDG-PET/CT with patients who received a CT as baseline. CUP: Cancer of unknown primary tumour. CT: Computed tomography. 2-<sup>18</sup>F]FDG: 2-deoxy-2-<sup>18</sup>F]fluoro-D-glucose. PET: Positron emission tomography.

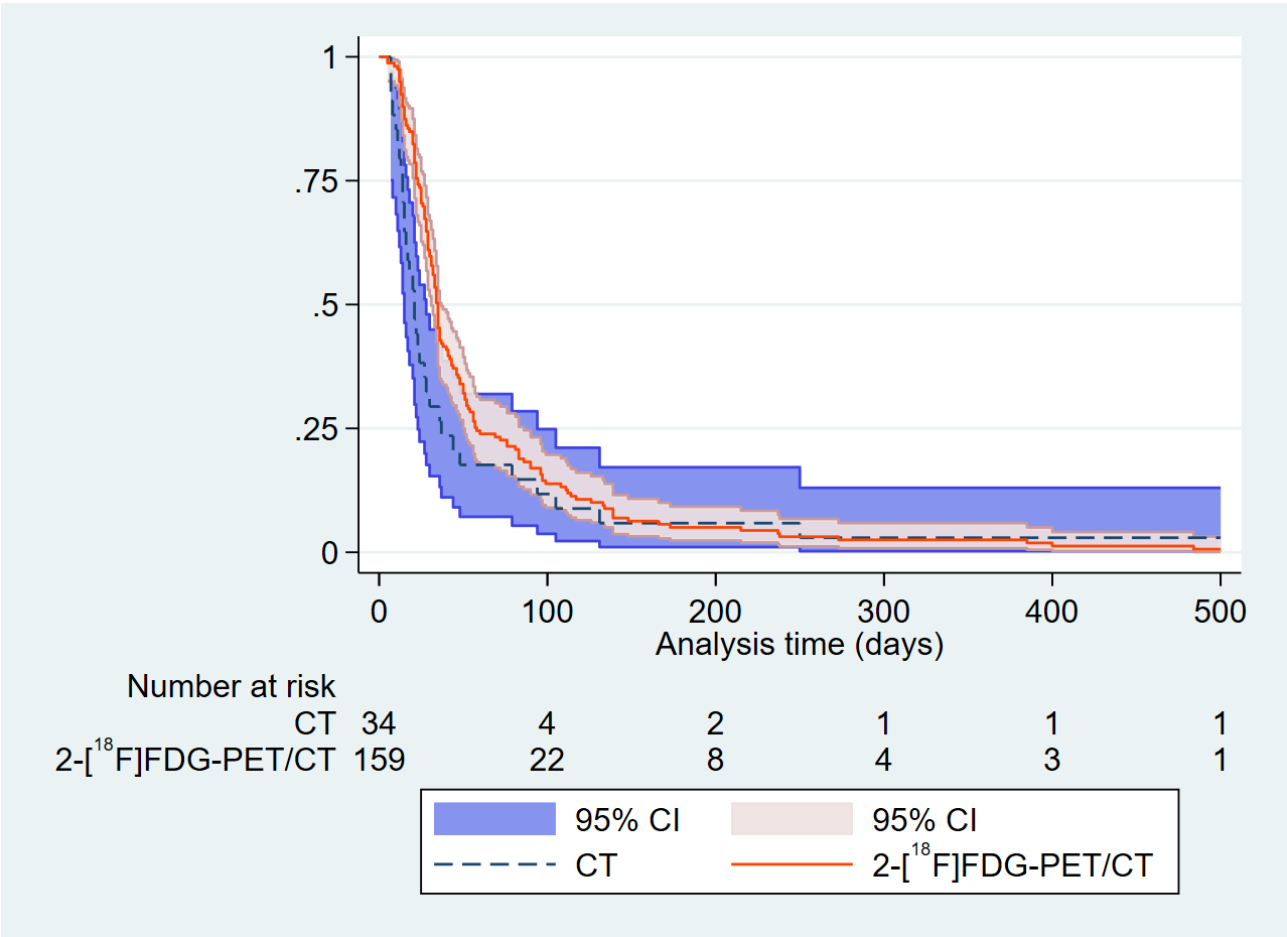

**Supplemental Fig. 4** Kaplan-Meier estimates regarding time to final diagnosis in CUP patients, comparing patients who received a 2-[<sup>18</sup>F]FDG-PET/CT with patients who received a CT. CUP: Cancer of unknown primary tumour. CT: Computed tomography. 2-[<sup>18</sup>F]FDG: 2-deoxy-2-[<sup>18</sup>F]fluoro-D-glucose. PET: Positron emission tomography.

The number of patients at risk decreased from 34 to 4 in the CT group and from 159 to 22 in the 2-[<sup>18</sup>F]FDG-PET/CT group within 100 days. Within 200 days, this number further decreased to 2 in the CT group and 8 in the 2-[<sup>18</sup>F]FDG-PET/CT group, while the numbers after 500 days were 1 in both groups. None of this proved statistically significant due to overlapping 95% confidence intervals

Title: 2-<sup>18</sup>F]FDG-PET/CT in cancer of unknown primary tumour – a retrospective register-based cohort study

Journal: Journal of Imaging

Authors: Heidi Rimer\*, Melina S. Jensen\*, Sara E. Dahlsgaard-Wallenius, Lise Eckhoff, Peter Thye-Rønn, Charlotte Kristiansen, Malene G. Hildebrandt, Oke Gerke

\*Shared co-first authorship

Corresponding author: Oke Gerke; University of Southern Denmark, Department of Clinical Research, Odense, Denmark and Odense University Hospital, Department of Nuclear Medicine, Odense, Denmark

Corresponding author E-mail: Oke.Gerke@rsyd.dk

| Variable            | Crude univariable model |               |         | Multivariable model 1:<br>adjusted for propensity-<br>score |               |         | Multivariable model 2:<br>adjusted for age, sex and<br>propensity score |               |         |
|---------------------|-------------------------|---------------|---------|-------------------------------------------------------------|---------------|---------|-------------------------------------------------------------------------|---------------|---------|
|                     | HR                      | 95% CI        | P-value | HR                                                          | 95% CI        | P-value | HR                                                                      | 95% CI        | P-value |
| PET/CT              | 0.66                    | 0.40-<br>1.08 | 0.098   | 0.69                                                        | 0.40-<br>1.20 | 0.18    | 0.65                                                                    | 0.37-<br>1.13 | 0.13    |
| Age                 |                         |               |         |                                                             |               |         | 1.00                                                                    | 0.99-<br>1.02 | 0.78    |
| Sex (Male)          |                         |               |         |                                                             |               |         | 1.55                                                                    | 1.06-<br>2.28 | 0.025   |
| Propensity<br>score |                         |               |         | 0.79                                                        | 0.17-<br>3.67 | 0.77    | 1.30                                                                    | 0.26-<br>6.48 | 0.75    |

**Supplemental Table 8** Cox-regression regarding time to final diagnosis in a subgroup of CUP patients who specifically received a definitive diagnosis, presenting the hazard ratio of patients who received a 2-<sup>18</sup>F]FDG-PET/CT with patients who received a CT as baseline. CUP: Cancer of unknown primary tumour. CT: Computed tomography. 2-<sup>18</sup>F]FDG: 2-deoxy-2-<sup>18</sup>F]fluoro-D-glucose. PET: Positron emission tomography.

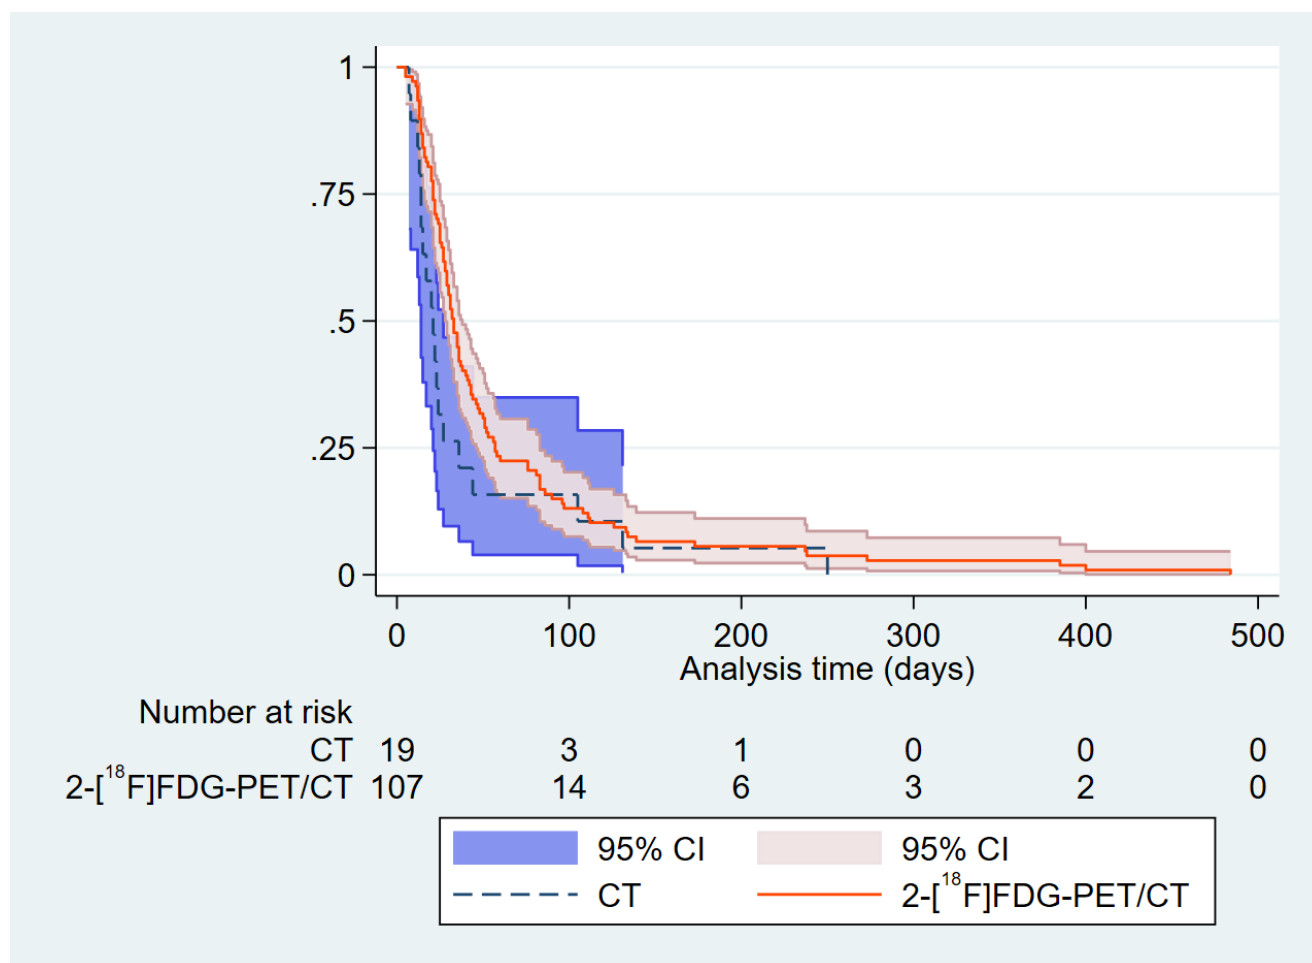

**Supplemental Fig. 5** Kaplan-Meier estimates regarding time to final diagnosis in a subgroup of CUP patients who specifically received a definitive diagnosis, comparing patients who received a 2- $^{18}\text{F}$ FDG-PET/CT with patients who received a CT. CUP: Cancer of unknown primary tumour. CT: Computed tomography. 2- $^{18}\text{F}$ FDG: 2-deoxy-2- $^{18}\text{F}$ fluoro-D-glucose. PET: Positron emission tomography.

The number of patients at risk decreased from 19 to 3 in the CT group and from 107 to 14 in the 2- $^{18}\text{F}$ FDG-PET/CT group within 100 days. Within 200 days, this number further decreased to 1 in the CT group and 6 in the 2- $^{18}\text{F}$ FDG-PET/CT group, while the numbers after 500 days were 0 in both groups. None of this proved statistically significant due to overlapping 95% confidence intervals
